# Supplementary material
Source: PubMed Central journal article supplement (PMC5666511)
Supplement: la7b02931_si_001.pdf [file la7b02931_si_001.pdf]

# Membrane-Fusogen Distance is Critical for Efficient Coiled-Coil-Peptide-Mediated Liposome Fusion

Geert A. Daudey, Harshal R. Zope<sup>†</sup>, Jens Voskuhl<sup>‡</sup>, Alexander Kros, Aimee L. Boyle\*

Supporting Information

## Contents

|                                                               |   |
|---------------------------------------------------------------|---|
| Synthetic procedure for Cholesteryl-amino-hemisuccinate ..... | 2 |
| Lipopeptide analysis .....                                    | 3 |
| Full data of 30min content mixing assay .....                 | 4 |
| Influence of CPE / CPK ratio on fusion efficiency .....       | 6 |
| CD spectroscopy .....                                         | 7 |

## Synthetic procedure for Cholesteryl-amino-hemisuccinate

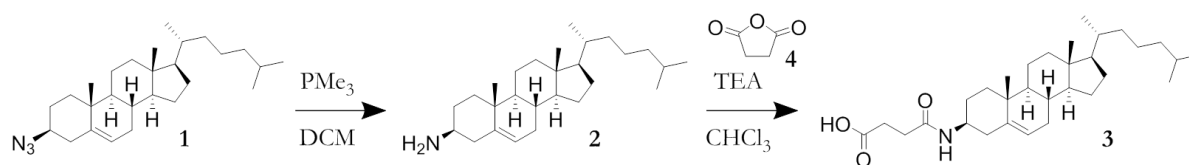

**Scheme S1.** Synthetic procedure towards cholesteryl- 4-amino-4- oxobutanoic acid (3). 3-azido-5-cholestene (1) is reduced to 3-amino-5-cholestene (2), which in turn is condensed with succinic anhydride (4) to yield final cholesterol anchor 3.

**3-Amino-5-cholestene (2):** To a solution of 3-Azido-5-cholestene (1) (15.8 g, 38.4 mmol) in dichloromethane, 4 equivalents of trimethylphosphine (1M solution in toluene) was added and the reaction was stirred overnight. When 3-Azido-5-cholestene was consumed as evidenced by TLC (eluent: hexane), the reaction was concentrated *in vacuo* to yield 2 (14.8 g, 100%) as a pure compound. <sup>1</sup>H NMR (300 MHz, CDCl<sub>3</sub>) δ 5.27 (s, 1H), 2.60 (m, 1H), 2.17-0.85 (m, 40H), 0.64 (s, 3H); <sup>13</sup>C NMR (75 MHz, CDCl<sub>3</sub>) δ 141.8, 120.7, 56.8, 56.2, 52.0, 50.3, 43.4, 42.3, 39.8, 39.5, 38.2, 36.6, 36.2, 35.8, 32.7, 31.9 (× 2), 28.3, 28.0, 24.3, 23.9, 22.8, 22.6, 21.0, 19.5, 18.7, 11.9; IR (film) ν 3354, 3260, 3154, 2936, 2896, 2849, 1464, 1437, 1381 cm<sup>-1</sup>; LRMS (ESI<sup>+</sup>) *m/z* 386.4 ([M+H]<sup>+</sup>, C<sub>27</sub>H<sub>45</sub>N calcd. 386.4).

**Cholesteryl-4-amino-4-oxobutanoic acid (3):** To a solution of 2 (10g, 26 mmol) in chloroform (150mL), 4 (7.8g, 78 mmol) was added. Triethylamine (8mL, 57 mmol) was added drop-wise to the solution and the reaction mixture was stirred overnight under nitrogen atmosphere at room temperature, until the starting material was completely consumed as evidenced by TLC (eluent: hexane: ethylacetate 1:1). The reaction mixture was transferred to a separatory funnel, and the organic layer was washed with water and brine, was dried with MgSO<sub>4</sub> and was concentrated *in vacuo* to afford cholesterol amide acid (10g) as a yellow solid. The crude cholesterol amide acid was purified by recrystallization in Acetonitrile: MeOH (1:1) at 4°C and was vacuum filtered to afford 3 as an off-white solid (8.7g, 76%) <sup>1</sup>H NMR (400MHz, CDCl<sub>3</sub>) δ 5.36 (s, 1H), 3.69 (s, 1H), 3.60 (m, 1H) 2.62 (m, 2H), 2.44 (m, 2H), 2.20-1.72 (m, 7H), 1.67-1.03 (m, 20H) 1.01 (s, 3H) 0.92 (d, *J* = 6.5 Hz, 3H), 0.87 (dd, *J* = 6.6, 1.7 Hz, 6H), 0.69 (s, 3H). TLC-MS (ESI<sup>+</sup>) *m/z* 486.4 ([M+H]<sup>+</sup>, C<sub>31</sub>H<sub>51</sub>NO<sub>3</sub> calcd. 486.4 g/mol).

## Lipopeptide analysis

Purity was confirmed using LC-MS analysis equipped with Gemini 3 $\mu$  C18 column coupled with Finnigan LCQ advantage max (Thermo) ESI-MS analyzer and the results are summarized in Table S1. LCMS eluents were A) H<sub>2</sub>O + 0.1% v/v TFA, B) MeCN + 0.1 v/v TFA, with a flow rate of 1 mL min<sup>-1</sup>. Gradient was applied between 2 and 12 min, from 10% B in A to 90% B in A.

**Table S1. Formulae and masses of synthesized lipopeptides.**

| peptide                         | formula                                                                          | Calc. mass | Found mass                                    |
|---------------------------------|----------------------------------------------------------------------------------|------------|-----------------------------------------------|
| CP <sub>0</sub> E <sub>3</sub>  | C <sub>144</sub> H <sub>236</sub> N <sub>26</sub> O <sub>40</sub>                | 2971.57    | 2972.14, [M+H] <sup>+</sup>                   |
| CP <sub>0</sub> K <sub>3</sub>  | C <sub>149</sub> H <sub>252</sub> N <sub>30</sub> O <sub>33</sub>                | 2991.78    | 2992.60, [M+H] <sup>+</sup>                   |
| CP <sub>4</sub> E <sub>3</sub>  | C <sub>154</sub> H <sub>255</sub> N <sub>27</sub> O <sub>45</sub>                | 3204.83    | 3206.63, [M+H] <sup>+</sup>                   |
| CP <sub>4</sub> K <sub>3</sub>  | C <sub>159</sub> H <sub>271</sub> N <sub>31</sub> O <sub>38</sub>                | 3225.04    | 1611.48, [M+2H] <sup>+2</sup>                 |
| CP <sub>8</sub> E <sub>3</sub>  | C <sub>163</sub> H <sub>273</sub> N <sub>27</sub> O <sub>49</sub>                | 3395.06    | 1696.40, [M+2H] <sup>+2</sup>                 |
| CP <sub>8</sub> K <sub>3</sub>  | C <sub>168</sub> H <sub>289</sub> N <sub>31</sub> O <sub>42</sub>                | 3415.28    | 1706.40, [M+2H] <sup>+2</sup>                 |
| CP <sub>12</sub> E <sub>3</sub> | C <sub>171</sub> H <sub>289</sub> N <sub>27</sub> O <sub>53</sub>                | 3571.27    | 1190.53, [M+3H] <sup>+3</sup>                 |
| CP <sub>12</sub> K <sub>3</sub> | C <sub>176</sub> H <sub>305</sub> N <sub>31</sub> O <sub>46</sub>                | 3591.49    | 1197.07, [M+3H] <sup>+3</sup>                 |
| CP <sub>16</sub> E <sub>3</sub> | C <sub>179</sub> H <sub>305</sub> N <sub>27</sub> O <sub>57</sub>                | 3747.48    | 1249.27, [M+3H] <sup>+3</sup>                 |
| CP <sub>16</sub> K <sub>3</sub> | C <sub>184</sub> H <sub>321</sub> N <sub>31</sub> O <sub>50</sub>                | 3767.70    | 1255.93, [M+3H] <sup>+3</sup>                 |
| LP <sub>0</sub> E <sub>3</sub>  | C <sub>147</sub> H <sub>256</sub> N <sub>26</sub> O <sub>43</sub> P <sup>-</sup> | 3106.78    | 1563.44, [M+H+NH <sub>4</sub> ] <sup>+2</sup> |
| LP <sub>0</sub> K <sub>3</sub>  | C <sub>150</sub> H <sub>271</sub> N <sub>29</sub> O <sub>37</sub> P <sup>-</sup> | 3103.96    | 1553.01, [M+2H] <sup>+2</sup>                 |
| LP <sub>2</sub> E <sub>3</sub>  | C <sub>153</sub> H <sub>267</sub> N <sub>27</sub> O <sub>46</sub> P <sup>-</sup> | 3251.94    | 1084.98, [M+3H] <sup>+3</sup>                 |
| LP <sub>2</sub> K <sub>3</sub>  | C <sub>156</sub> H <sub>282</sub> N <sub>30</sub> O <sub>40</sub> P <sup>-</sup> | 3249.12    | 1084.03, [M+3H] <sup>+3</sup>                 |
| LP <sub>4</sub> E <sub>3</sub>  | C <sub>157</sub> H <sub>275</sub> N <sub>27</sub> O <sub>48</sub> P <sup>-</sup> | 3340.04    | 1114.33, [M+3H] <sup>+3</sup>                 |
| LP <sub>4</sub> K <sub>3</sub>  | C <sub>160</sub> H <sub>290</sub> N <sub>30</sub> O <sub>42</sub> P <sup>-</sup> | 3337.22    | 1113.72, [M+3H] <sup>+3</sup>                 |
| LP <sub>8</sub> E <sub>3</sub>  | C <sub>166</sub> H <sub>293</sub> N <sub>27</sub> O <sub>52</sub> P <sup>-</sup> | 3530.28    | 1178.04, [M+3H] <sup>+3</sup>                 |
| LP <sub>8</sub> K <sub>3</sub>  | C <sub>169</sub> H <sub>308</sub> N <sub>30</sub> O <sub>46</sub> P <sup>-</sup> | 3527.46    | 1177.09, [M+3H] <sup>+3</sup>                 |
| LP <sub>12</sub> E <sub>3</sub> | C <sub>174</sub> H <sub>309</sub> N <sub>27</sub> O <sub>56</sub> P <sup>-</sup> | 3706.49    | 1236.74, [M+3H] <sup>+3</sup>                 |
| LP <sub>12</sub> K <sub>3</sub> | C <sub>177</sub> H <sub>324</sub> N <sub>30</sub> O <sub>50</sub> P <sup>-</sup> | 3703.67    | 1235.79, [M+3H] <sup>+3</sup>                 |

## Full data of 30min content mixing assay

Content mixing experiments were followed for 30 minutes in a continuous fashion and showed characteristic 1<sup>st</sup> order kinetics in the initial minutes (*Figure S1, and insets*). Therefore, fluorescence increase after 4 minutes is used to estimate the relationship of  $L_{PEG}$  and the fusion efficiency. Error bars and absolute values after 4 and 30 minutes were obtained by at least 3 individual experiments and are shown in Figure S, as a function of  $m$ ,  $n$ . In representative negative control experiments, peptide-containing liposomes ( $m$ ,  $n = 4$  or 8) were mixed with plain liposomes and the fluorescence increase was recorded for 30 minutes.

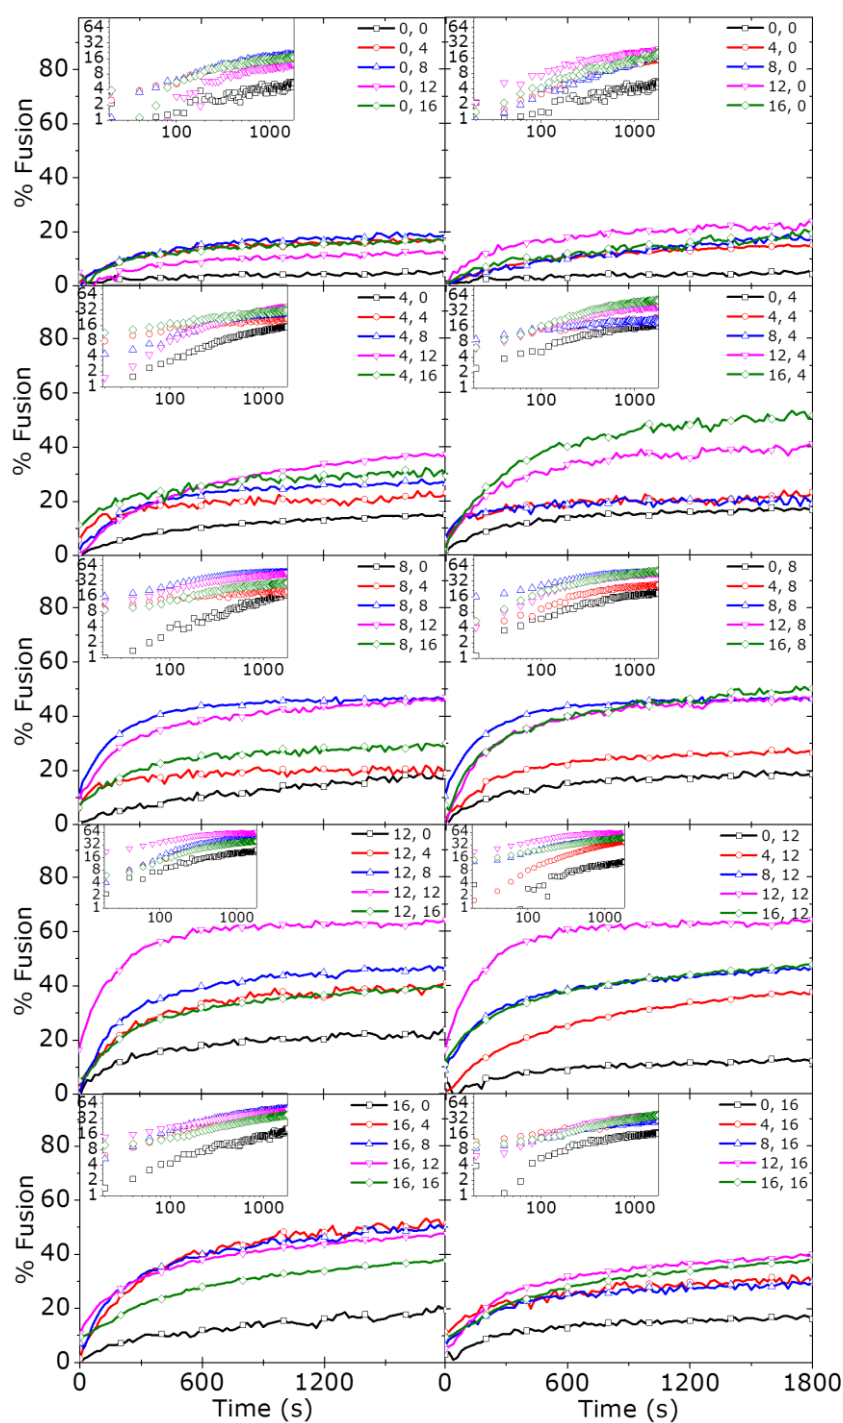

**Figure S1.** Content mixing of  $CP_mE_3$  and  $CP_nK_3$  decorated liposomes as a function of  $m$ ,  $n$ . Insets with log scale illustrate 1<sup>st</sup> order kinetics until at least the 4<sup>th</sup> minute. [Total lipid] = 0.1 mM with 1 mol% lipopeptide, PBS pH 7.4.

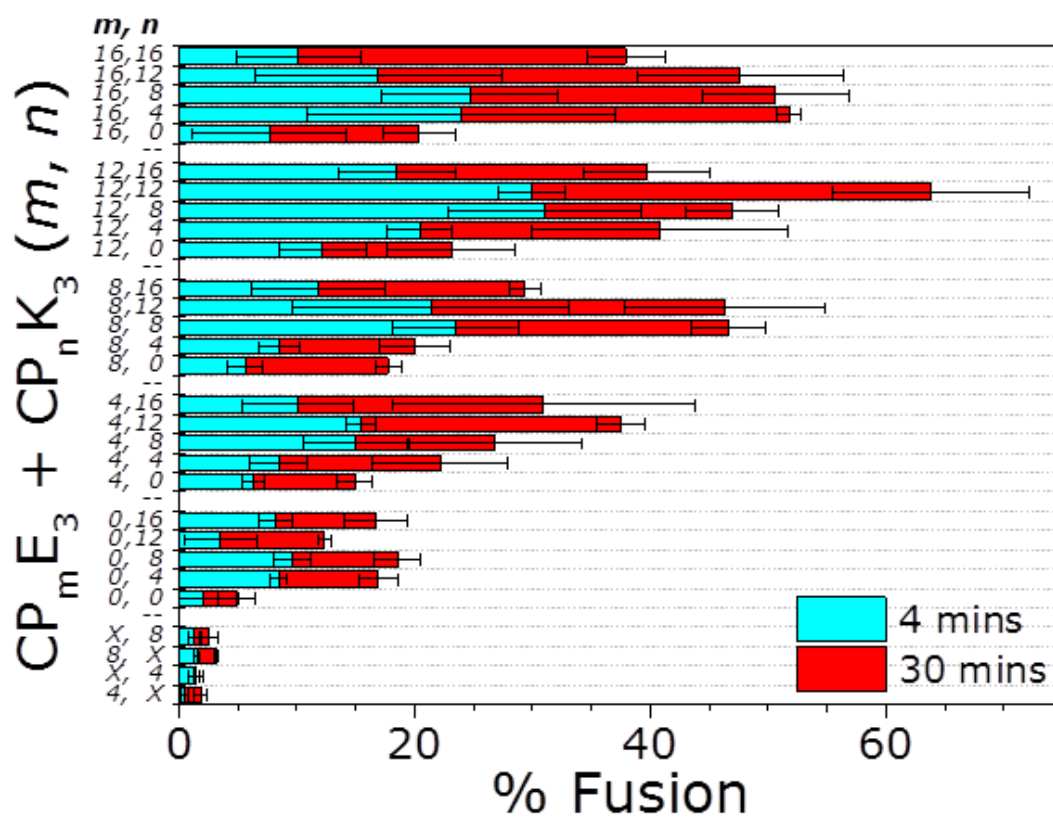

**Figure S2.** Time resolved rate of fusion (content mixing) with lipopeptide  $CP_mE_3$  or  $CP_nK_3$  decorated liposomes as a function of  $m, n$ , indicated by an increase in sulforhodamine B emission after 4 and 30 minutes. For control experiments the omitted peptide-functionalized liposomes are represented by  $X$ . [Total lipid] = 0.1 mM with 1 mol% lipopeptide, in PBS pH 7.4.

### Influence of CPE / CPK ratio on fusion efficiency

A change in peptide functionalization ratio reveals the influence of peptide equilibria on the fusion process. Again, results are shown as a function of  $m, n$ . (Figure S2)

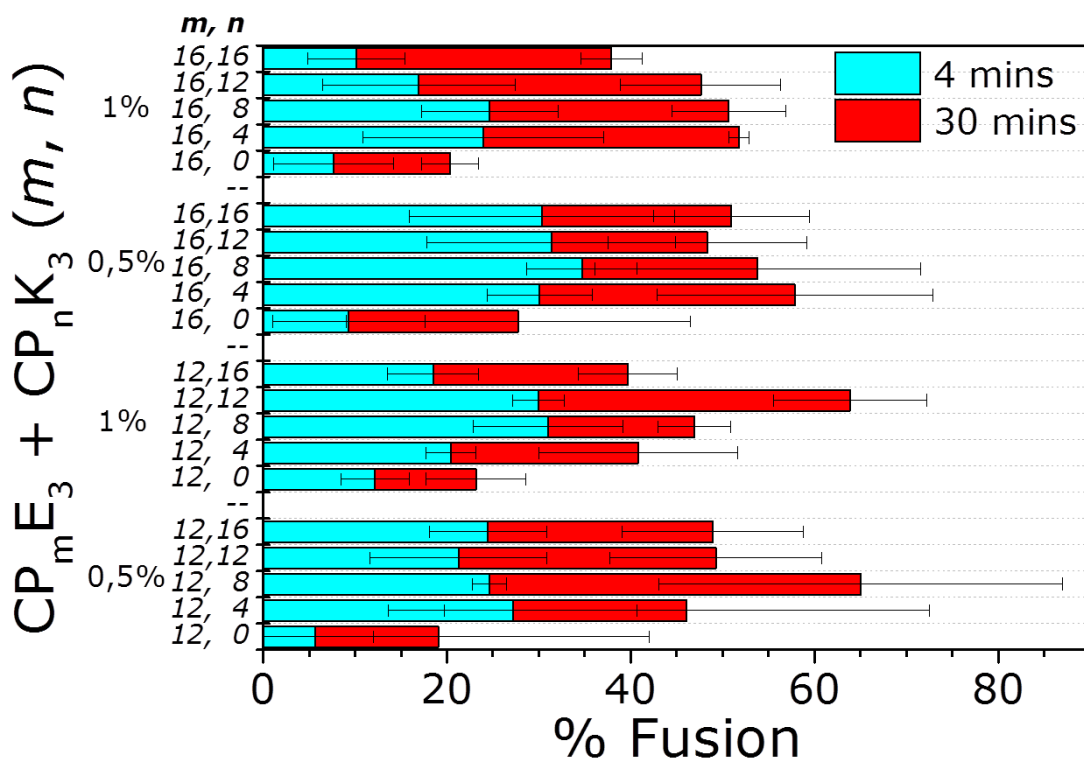

**Figure S2.** Time resolved rate of fusion (content mixing) with peptide  $CP_mE_3$  and  $CP_nK_3$  decorated liposomes as a function of  $m, n$ , and  $[CP_mE_3]$ , as indicated by an increase in sulforhodamine B emission after 4 and 30 minutes.  $[Total\ lipid] = 0.1\ mM$  with  $1\ mol\% CP_nK_3$  and  $1\ mol\%$  or  $0.5\ mol\% CP_mE_3$ , PBS pH 7.4.

## CD spectroscopy

Characteristics ( $\theta_{222}/\theta_{208}$  and percentage helicity at  $\theta_{222}$ ) of the spectra as summarized in Table 2, are supported with the recorded spectra between 207nm and 250 nm (Figure S3). Below 207 nm, spectra were too noisy due to scattering of the signal by liposomes.

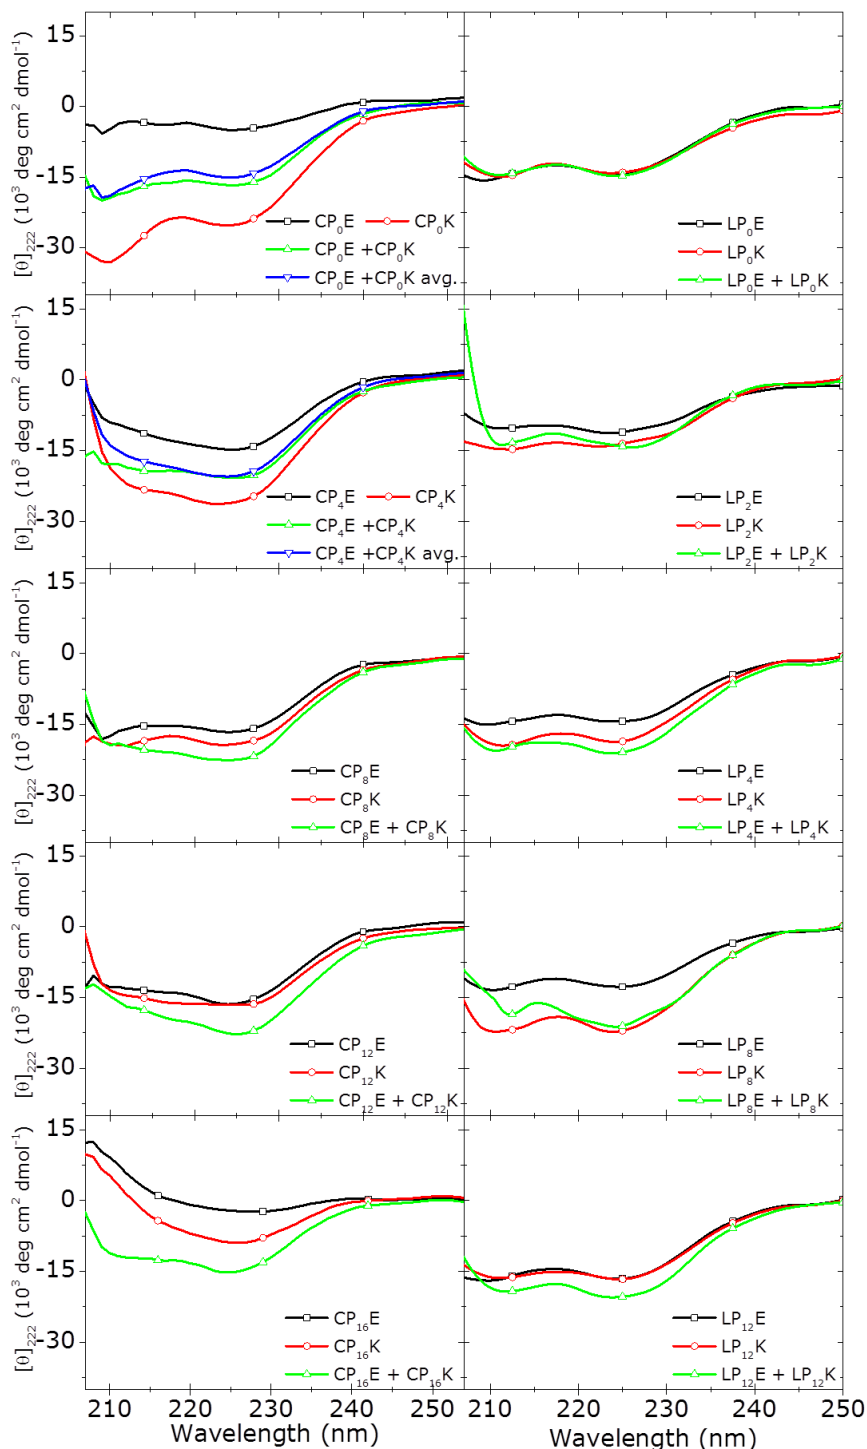

**Figure S3.** Peptide secondary structure of E- (black) and K- (red) decorated liposomes before and after mixing (green), measured by circular dichroism. Left series is with cholesterol anchor, right series contain a DOPE anchor. Only symmetric pairs ( $m = n$ ) are used in this study. With  $CP_0$  and  $CP_4$  anchor coiled coil formation is not evident, so the calculated average of the individual  $E_3$  and  $K_3$  spectra is added (blue). [Total lipid] = 0.5 mM with 1mol% lipopeptide, PBS pH 7.4, and cuvette path length of 5mm.
